# Supplementary material
Source: Springer Nature journal article supplement (https://www.springermedizin.de/resource/supplementary/12885_2013_4406_MOESM2_ESM.pdf/9466346)
Supplement: MOESM2 [file 9466346]

Screening of all newly diagnosed breast cancer patients scheduled for surgery/treatment at the USC NCCC or LAC

Written informed consent

Randomization

Baseline assessments (within 3-6 months post-treatment)  
(T1)

Progressive combined  
exercise training

16 weeks

**N = 50**

Usual Care

16 weeks

**N = 50**

Endpoint assessments (T2)

Follow-up assessments  
(3 months post-  
intervention)  
(T3)

Progressive combined  
exercise training  
(optional)
